# Supplementary material for: ATRA modulates mechanical activation of TGF-β by pancreatic stellate cells
Source: PubMed Central journal article supplement (PMC4931506; doi:10.1038/srep27639), 2016-07-04
Supplement: srep27639-s1.pdf [file srep27639-s1.pdf]

## **ATRA modulates mechanical activation of TGF- $\beta$ by pancreatic stellate cells**

Muge Sarper, Ernesto Cortes, Tyler J. Lieberthal, & Armando del Río Hernández\*

Cellular and Molecular Biomechanics Laboratory, Department of Bioengineering, Faculty of Engineering, Imperial College London

\*Corresponding author: Armando del Río Hernández

Cellular and Molecular Biomechanics Laboratory, Department of Bioengineering, Faculty of Engineering, Imperial College London, South Kensington Campus, London SW7 2AZ, United Kingdom [a.del-rio-hernandez@imperial.ac.uk](mailto:a.del-rio-hernandez@imperial.ac.uk)

0044 (0)20 7594 5187

## Supplementary Information

### Supplementary figure 1

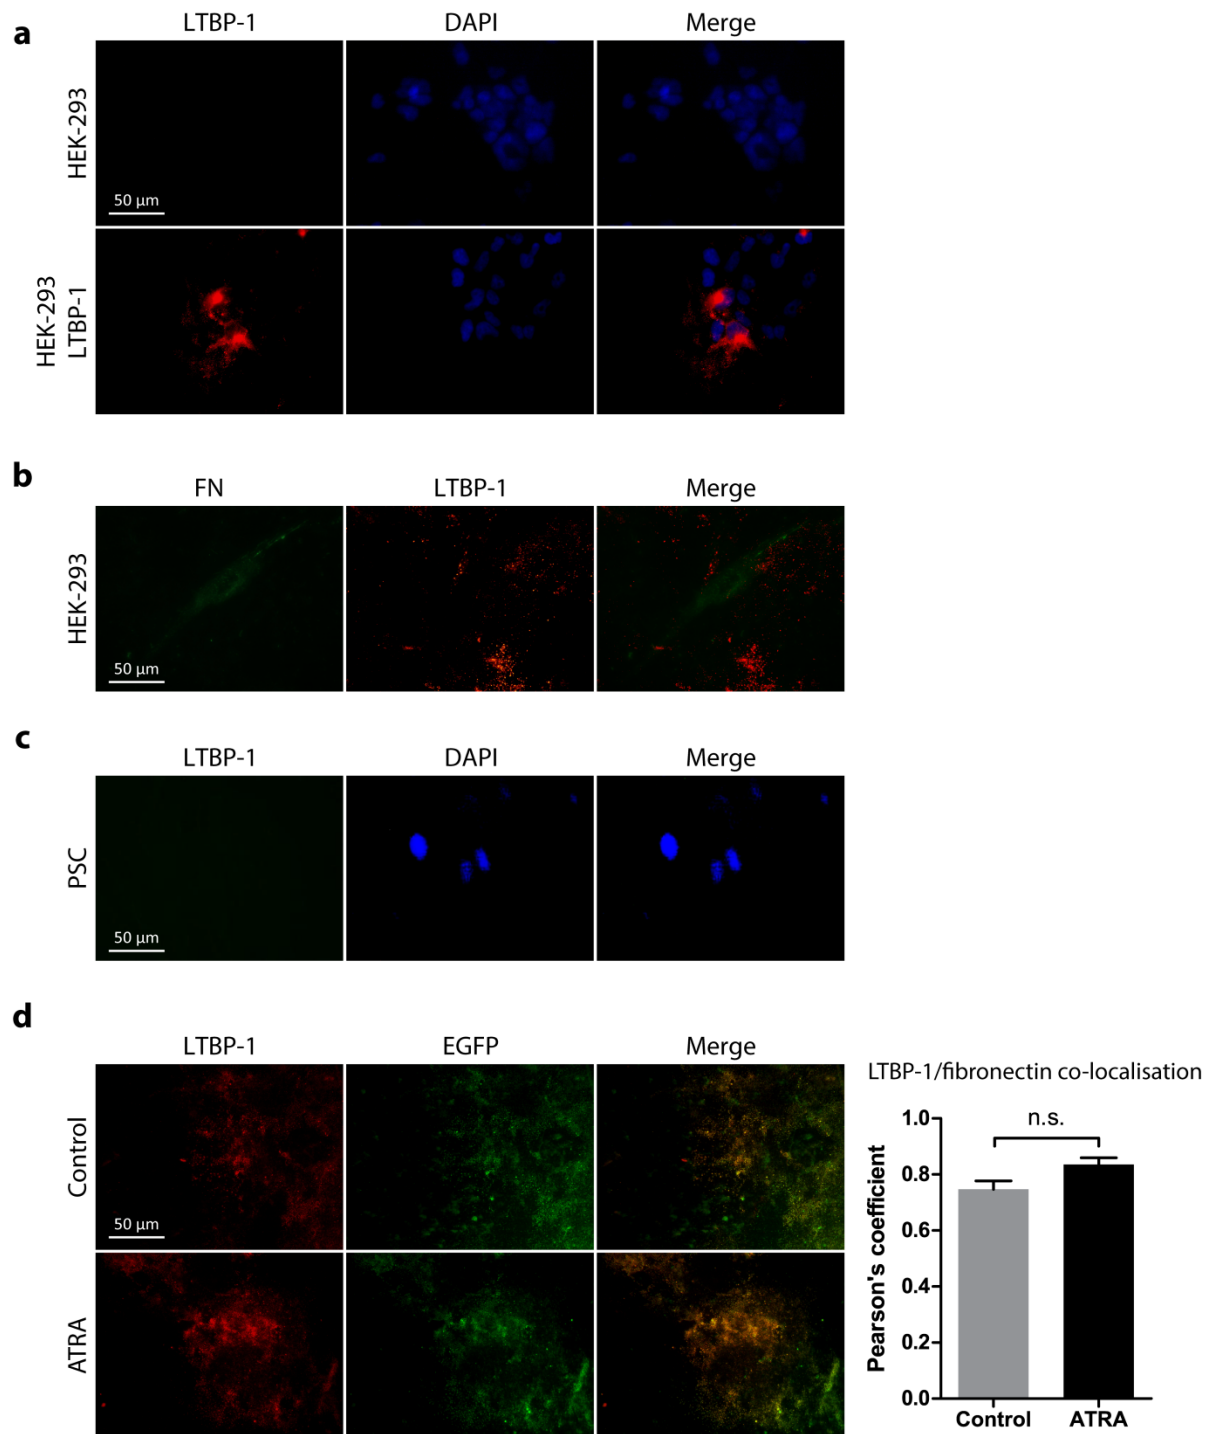

**Figure S1. Characterisation of HEK-293 generated ECM matrices.** (a) Immunofluorescent images show LTBP-1 (red) over-expression in HEK-293 cells. DAPI shows nuclear staining. (b) LTBP-1 transfected HEK-293 cells were fluorescently immunostained for fibronectin (green) and LTBP-1 (red) as described in materials and method section. There was no LTBP-1 fibril organisation by HEK293 cells. (c) PSCs were seeded on glass coverslips and after 48 hours stained for LTBP-1. LTBP-1 expression by PSCs was found to be minimal. DAPI shows nuclear staining. (d) Control or ATRA treated PSCs were seeded on pre-deposited LTBP-1 rich matrices and incubated for 48 hours. Coverslips were then immunostained for EGFP (green) and LTBP-1 (red). Co-localisation analysis indicated that LTBP-1 deposited in the ECM is EGFP<sup>+</sup> (HEK-293 derived rather than PSC derived), which by extension indicates a negligible secretion of TGF- $\beta$  by PSCs during the 48 hour incubation. Representative of 3 independent experiments, Error bars show  $\pm$  SEM, n.s. = not significant.

## Supplementary figure 2

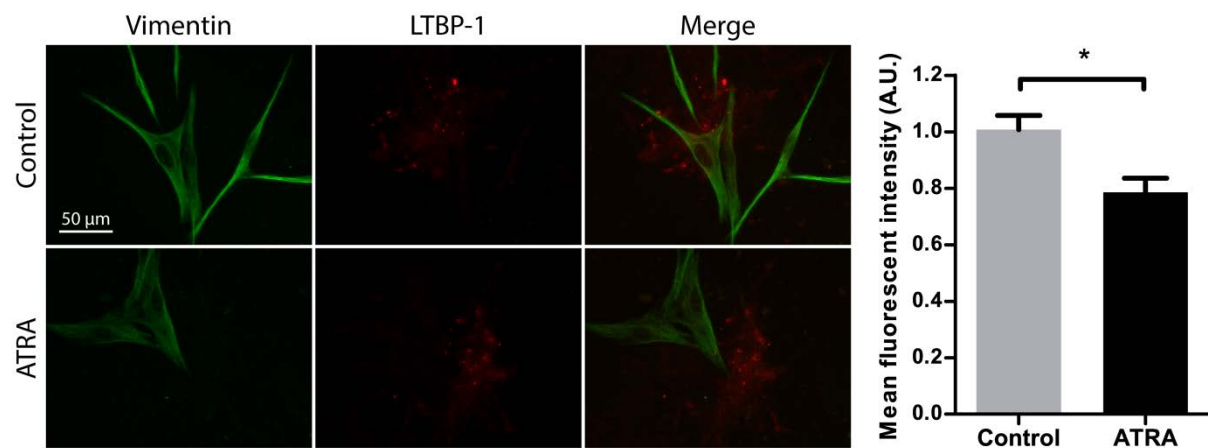

**Figure S2. Expression of cell contractility marker vimentin on LTBP-1 matrices.** ATRA treated or control PSCs were seeded on LTBP-1 rich matrices for 48 hours and stained for vimentin. ATRA reduced the expression of vimentin, indicating a reduction in a contractile phenotype. Representative of 1 experiment, 28 cells for control and 13 cells for ATRA, \* $p < 0.05$ , error bar shows  $\pm$  SEM, A.U. = arbitrary units.
